# Supplementary material
Source: PubMed Central journal article supplement (PMC5858958)
Supplement: NIHMS921721-supplement.pdf [file NIHMS921721-supplement.pdf]

# CONFLICT OF INTEREST STATEMENT

## *The Journal of Arthroplasty*

(Adopted from the American Academy of Orthopaedic Surgeons disclosure statement)

The following form **must be filled out completely and submitted by each author (example, 6 authors, 6 forms). If no discloser is required, please write/type "none" at the end of each sentence.**

Manuscript Title: A multicenter study of irrigation and debridement in total knee arthroplasty periprosthetic joint infection: Treatment failure is high

1. Royalties from a company or supplier (The following conflicts were disclosed): None
2. Speakers bureau/paid presentations for a company or supplier: None
- 3A. Paid employee for a company or supplier (The following conflicts were disclosed): None
- 3B. Paid consultant for a company or supplier (The following conflicts were disclosed): Smith Nephew
- 3C. Unpaid consultants for a company or supplier (The following conflicts were disclosed): None
4. Stock or stock options in a company or supplier (The following conflicts were disclosed): None
5. Research support from a company or supplier as a Principal Investigator: NIH
6. Other financial or material support from a company or supplier: None
7. Royalties, financial or material support from publishers: None
8. Medical/Orthopaedic publications editorial/governing board: AAOS Biomedical Engineering Committee
9. Board member/committee appointments for a society: None

**Each author must sign AND print or type his/her name, date and submit a separate form**

In addition, one BLINDED Conflict of Interest form (no author names used) should be submitted per manuscript with all author disclosures.

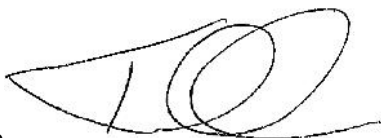

Kenneth Urish

Author Signature

June 18, 2017

# CONFLICT OF INTEREST STATEMENT

## *The Journal of Arthroplasty*

(Adopted from the American Academy of Orthopaedic Surgeons disclosure statement)

The following form **must be filled out completely and submitted by each author (example, 6 authors, 6 forms)**. **If no discloser is required, please write/type "none" at the end of each sentence.**

Manuscript Title: A multicenter study of irrigation and debridement in total knee arthroplasty periprosthetic joint infection: Treatment failure is high

1. Royalties from a company or supplier (The following conflicts were disclosed): None
2. Speakers bureau/paid presentations for a company or supplier: None
- 3A. Paid employee for a company or supplier (The following conflicts were disclosed): None
- 3B. Paid consultant for a company or supplier (The following conflicts were disclosed): None
- 3C. Unpaid consultants for a company or supplier (The following conflicts were disclosed): None
4. Stock or stock options in a company or supplier (The following conflicts were disclosed): None
5. Research support from a company or supplier as a Principal Investigator: None
6. Other financial or material support from a company or supplier: None
7. Royalties, financial or material support from publishers: None
8. Medical/Orthopaedic publications editorial/governing board: None
9. Board member/committee appointments for a society: None

**Each author must sign AND print or type his/her name, date and submit a separate form**

In addition, one BLINDED Conflict of Interest form (no author names used) should be submitted per manuscript with all author disclosures.

Andrew Griffith

Author Signature

June 18, 2017

# CONFLICT OF INTEREST STATEMENT

## *The Journal of Arthroplasty*

(Adopted from the American Academy of Orthopaedic Surgeons disclosure statement)

The following form **must be filled out completely and submitted by each author (example, 6 authors, 6 forms)**. **If no discloser is required, please write/type "none" at the end of each sentence.**

Manuscript Title: A multicenter study of irrigation and debridement in total knee arthroplasty periprosthetic joint infection: Treatment failure is high

1. Royalties from a company or supplier (The following conflicts were disclosed): None
2. Speakers bureau/paid presentations for a company or supplier: None
- 3A. Paid employee for a company or supplier (The following conflicts were disclosed): None
- 3B. Paid consultant for a company or supplier (The following conflicts were disclosed): None
- 3C. Unpaid consultants for a company or supplier (The following conflicts were disclosed): None
4. Stock or stock options in a company or supplier (The following conflicts were disclosed): None
5. Research support from a company or supplier as a Principal Investigator: None
6. Other financial or material support from a company or supplier: None
7. Royalties, financial or material support from publishers: None
8. Medical/Orthopaedic publications editorial/governing board: None
9. Board member/committee appointments for a society: None

**Each author must sign AND print or type his/her name, date and submit a separate form**

In addition, one BLINDED Conflict of Interest form (no author names used) should be submitted per manuscript with all author disclosures.

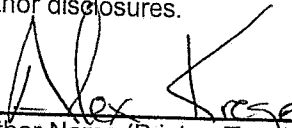  
\_\_\_\_\_  
Author Name (Print or Type)

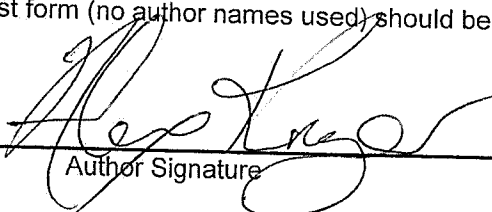  
\_\_\_\_\_  
Author Signature

June 18, 2017

# CONFLICT OF INTEREST STATEMENT

## *The Journal of Arthroplasty*

(Adopted from the American Academy of Orthopaedic Surgeons disclosure statement)

The following form **must be filled out completely and submitted by each author (example, 6 authors, 6 forms)**. **If no discloser is required, please write/type "none" at the end of each sentence.**

Manuscript Title: A multicenter study of irrigation and debridement in total knee arthroplasty periprosthetic joint infection: Treatment failure is high

1. Royalties from a company or supplier (The following conflicts were disclosed): None
2. Speakers bureau/paid presentations for a company or supplier: None
- 3A. Paid employee for a company or supplier (The following conflicts were disclosed): None
- 3B. Paid consultant for a company or supplier (The following conflicts were disclosed): None
- 3C. Unpaid consultants for a company or supplier (The following conflicts were disclosed): None
4. Stock or stock options in a company or supplier (The following conflicts were disclosed): None
5. Research support from a company or supplier as a Principal Investigator: None
6. Other financial or material support from a company or supplier: None
7. Royalties, financial or material support from publishers: None
8. Medical/Orthopaedic publications editorial/governing board: None
9. Board member/committee appointments for a society: None

**Each author must sign AND print or type his/her name, date and submit a separate form**

In addition, one BLINDED Conflict of Interest form (no author names used) should be submitted per manuscript with all author disclosures.

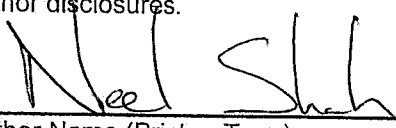  
Author Name (Print or Type)

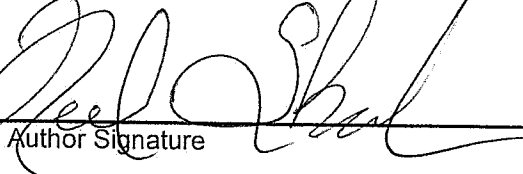  
Author Signature

June 18, 2017

# CONFLICT OF INTEREST STATEMENT

## *The Journal of Arthroplasty*

(Adopted from the American Academy of Orthopaedic Surgeons disclosure statement)

The following form **must be filled out completely and submitted by each author (example, 6 authors, 6 forms). If no discloser is required, please write/type "none" at the end of each sentence.**

Manuscript Title: A multicenter study of irrigation and debridement in total knee arthroplasty periprosthetic joint infection: Treatment failure is high

1. Royalties from a company or supplier (The following conflicts were disclosed): None
2. Speakers bureau/paid presentations for a company or supplier: None
- 3A. Paid employee for a company or supplier (The following conflicts were disclosed): None
- 3B. Paid consultant for a company or supplier (The following conflicts were disclosed): None
- 3C. Unpaid consultants for a company or supplier (The following conflicts were disclosed): None
4. Stock or stock options in a company or supplier (The following conflicts were disclosed): None
5. Research support from a company or supplier as a Principal Investigator: None
6. Other financial or material support from a company or supplier: None
7. Royalties, financial or material support from publishers: None
8. Medical/Orthopaedic publications editorial/governing board: None
9. Board member/committee appointments for a society: None

**Each author must sign AND print or type his/her name, date and submit a separate form**

In addition, one BLINDED Conflict of Interest form (no author names used) should be submitted per manuscript with all author disclosures.

Author Name (Print or Type)

Author Signature

June 18, 2017

# CONFLICT OF INTEREST STATEMENT

## *The Journal of Arthroplasty*

(Adopted from the American Academy of Orthopaedic Surgeons disclosure statement)

The following form **must be filled out completely and submitted by each author (example, 6 authors, 6 forms). If no discloser is required, please write/type "none" at the end of each sentence.**

Manuscript Title: A multicenter study of irrigation and debridement in total knee arthroplasty periprosthetic joint infection: Treatment failure is high

1. Royalties from a company or supplier (The following conflicts were disclosed): None
2. Speakers bureau/paid presentations for a company or supplier: None
- 3A. Paid employee for a company or supplier (The following conflicts were disclosed): None
- 3B. Paid consultant for a company or supplier (The following conflicts were disclosed): None
- 3C. Unpaid consultants for a company or supplier (The following conflicts were disclosed): None
4. Stock or stock options in a company or supplier (The following conflicts were disclosed): None
5. Research support from a company or supplier as a Principal Investigator: None
6. Other financial or material support from a company or supplier: None
7. Royalties, financial or material support from publishers: None
8. Medical/Orthopaedic publications editorial/governing board: None
9. Board member/committee appointments for a society: None

**Each author must sign AND print or type his/her name, date and submit a separate form**

In addition, one BLINDED Conflict of Interest form (no author names used) should be submitted per manuscript with all author disclosures.

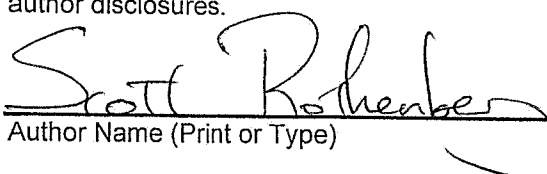  
Author Name (Print or Type)        
Author Signature

June 18, 2017

# CONFLICT OF INTEREST STATEMENT

## *The Journal of Arthroplasty*

(Adopted from the American Academy of Orthopaedic Surgeons disclosure statement)

The following form **must be filled out completely and submitted by each author (example, 6 authors, 6 forms). If no discloser is required, please write/type "none" at the end of each sentence.**

Manuscript Title: A multicenter study of irrigation and debridement in total knee arthroplasty periprosthetic joint infection: Treatment failure is high

1. Royalties from a company or supplier (The following conflicts were disclosed). Slack
2. Speakers bureau/paid presentations for a company or supplier: None
- 3A. Paid employee for a company or supplier (The following conflicts were disclosed): None
- 3B. Paid consultant for a company or supplier (The following conflicts were disclosed): None
- 3C. Unpaid consultants for a company or supplier (The following conflicts were disclosed): None
4. Stock or stock options in a company or supplier (The following conflicts were disclosed): None
5. Research support from a company or supplier as a Principal Investigator: None
6. Other financial or material support from a company or supplier: None
7. Royalties, financial or material support from publishers: None
8. Medical/Orthopaedic publications editorial/governing board: None
9. Board member/committee appointments for a society: None

**Each author must sign AND print or type his/her name, date and submit a separate form**

In addition, one BLINDED Conflict of Interest form (no author names used) should be submitted per manuscript with all author disclosures.

Brian Klatt

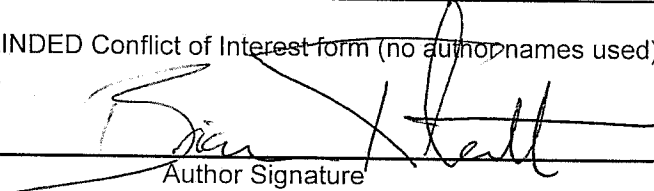  
Author Signature

June 18, 2017

# CONFLICT OF INTEREST STATEMENT

## *The Journal of Arthroplasty*

(Adopted from the American Academy of Orthopaedic Surgeons disclosure statement)

The following form **must be filled out completely and submitted by each author (example, 6 authors, 6 forms). If no discloser is required, please write/type "none" at the end of each sentence.**

Manuscript Title: A multicenter study of irrigation and debridement in total knee arthroplasty periprosthetic joint infection: Treatment failure is high

1. Royalties from a company or supplier (The following conflicts were disclosed): None
2. Speakers bureau/paid presentations for a company or supplier: None
- 3A. Paid employee for a company or supplier (The following conflicts were disclosed): None
- 3B. Paid consultant for a company or supplier (The following conflicts were disclosed): Smith Nephew, BodyCad
- 3C. Unpaid consultants for a company or supplier (The following conflicts were disclosed): None
4. Stock or stock options in a company or supplier (The following conflicts were disclosed): None
5. Research support from a company or supplier as a Principal Investigator: NIH
6. Other financial or material support from a company or supplier: None
7. Royalties, financial or material support from publishers: None
8. Medical/Orthopaedic publications editorial/governing board: None
9. Board member/committee appointments for a society: None

**Each author must sign AND print or type his/her name, date and submit a separate form**

In addition, one BLINDED Conflict of Interest form (no author names used) should be submitted per manuscript with all author disclosures.

Brian Hamlin

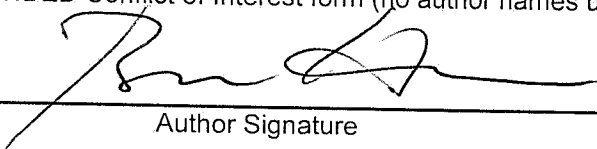

Author Signature

June 18, 2017



# CONFLICT OF INTEREST STATEMENT

## *The Journal of Arthroplasty*

(Adopted from the American Academy of Orthopaedic Surgeons disclosure statement)

The following form **must be filled out completely and submitted by each author (example, 6 authors, 6 forms). If no discloser is required, please write/type "none" at the end of each sentence.**

Manuscript Title: A multicenter study of irrigation and debridement in total knee arthroplasty periprosthetic joint infection: Treatment failure is high

1. Royalties from a company or supplier (The following conflicts were disclosed): None
2. Speakers bureau/paid presentations for a company or supplier: None
- 3A. Paid employee for a company or supplier (The following conflicts were disclosed): None
- 3B. Paid consultant for a company or supplier (The following conflicts were disclosed): None
- 3C. Unpaid consultants for a company or supplier (The following conflicts were disclosed): None
4. Stock or stock options in a company or supplier (The following conflicts were disclosed): None
5. Research support from a company or supplier as a Principal Investigator: None
6. Other financial or material support from a company or supplier: None
7. Royalties, financial or material support from publishers: None
8. Medical/Orthopaedic publications editorial/governing board: None
9. Board member/committee appointments for a society: Senior Contributing Editor, Physical Therapy Journal; Scientific Director of the Physical Therapy Outcomes Registry, American Physical Therapy Association

**Each author must sign AND print or type his/her name, date and submit a separate form**

In addition, one BLINDED Conflict of Interest form (no author names used) should be submitted per manuscript with all author disclosures.



James Irrgang

Author Signature

June 18, 2017
